# Supplementary material for: Urinary proteomics links keratan sulfate degradation and lysosomal enzymes to early type 1 diabetes
Source: PLoS One. 2020 May 26;15(5):e0233639. doi: 10.1371/journal.pone.0233639 (PMC7250451; doi:10.1371/journal.pone.0233639)
Supplement: S4 Table — (XLSX) [file pone.0233639.s004.xlsx]

## Sheet: S4
Supplemental Table S4. Enriched KEGG pathways and functional hierarchies associated with the 34 signature proteins.
KEGG Pathway ID	Name	Type	Number of Genes	Genes
hsa04142	Lysosome	KEGG Pathway	15	ARSB; ASAH1; CTSA; CTSB; CTSC; CTSD; CTSH; FUCA1; GALNS; GLB1; GNS; HEXA; HEXB; MAN2B1; NAGA
hsa01100	Metabolic pathways	KEGG Pathway	12	ACY1; ALDH1A1; ARSB; ASAH1; GALNS; GLB1; GNS; HEXA; HEXB; NAGA; SHMT1; TPI1
hsa00511	Other glycan degradation	KEGG Pathway	6	FUCA1; GLB1; HEXA; HEXB; MAN2B1; MAN2B2
hsa00531	Glycosaminoglycan degradation	KEGG Pathway	6	ARBS; GALNS; GLB1; GNS; HEXA; HEXB
hsa04210	Apoptosis	KEGG Pathway	4	CTSB; CTSC; CTSD; CTSH
hsa00603	Glycosphingolipid biosynthesis - globo and isoglobo series	KEGG Pathway	3	HEXA; HEXB; NAGA
hsa00604	Glycosphingolipid biosynthesis - ganglio series	KEGG Pathway	3	GLB1; HEXA; HEXB
hsa01230	Biosynthesis of amino acids	KEGG Pathway	3	ACY1; SHMT1; TPI1
hsa01523	Antifolate resistance	KEGG Pathway	2	GGH; SHMT1
hsa05152	Tuberculosis	KEGG Pathway	2	CD14; CTSD
hsa04140	Autophagy	KEGG Pathway	2	CTSB; CTSD
hsa04064	NF-kappa B signaling pathway	KEGG Pathway	2	CD14; VCAM1
hsa00600	Sphingolipid metabolism	KEGG Pathway	2	ASAH1; GLB1
hsa01200	Carbon metabolism	KEGG Pathway	2	SHMT1; TPI1
hsa04071	Sphingolipid signaling pathway	KEGG Pathway	2	ASAH1; CTSD
hsa00520	Amino sugar and nucleotide sugar metabolism	KEGG Pathway	2	HEXA; HEXB
hsa00513	Various types of N-glycan biosynthesis	KEGG Pathway	2	HEXA; HEXB
hsa00260	Glycine, serine and threonine metabolism - Homo sapiens	KEGG Pathway	1	SHMT1
hsa04924	Renin secretion	KEGG Pathway	1	CTSB
hsa04621	NOD-like receptor signaling pathway	KEGG Pathway	1	CTSB
hsa04514	Cell adhesion molecules (CAMs)	KEGG Pathway	1	VCAM1
hsa00010	Glycolysis/Gluconeogenesis	KEGG Pathway	1	TPI1
hsa00051	Fructose and mannose metabolism	KEGG Pathway	1	TPI1
hsa00790	Folate biosynthesis	KEGG Pathway	1	GGH
hsa04010	MAPK signaling pathway	KEGG Pathway	1	CD14
hsa04612	Antigen processing and presentation	KEGG Pathway	1	CTSB
hsa05131	Shigellosis	KEGG Pathway	1	CD14
hsa05133	Pertussis	KEGG Pathway	1	CD14
hsa05134	Legionellosis	KEGG Pathway	1	CD14
hsa05144	Malaria	KEGG Pathway	1	VCAM1
hsa05146	Amoebiasis	KEGG Pathway	1	CD14
hsa05418	Fluid shear stress and atherosclerosis	KEGG Pathway	1	VCAM1
hsa04145	Phagosome	KEGG Pathway	1	CD14
hsa01210	2-Oxocarboxylic acid metabolism	KEGG Pathway	1	ACY1
hsa00630	Glyoxylate and dicarboxylate metabolism	KEGG Pathway	1	SHMT1
hsa00220	Arginine biosynthesis	KEGG Pathway	1	ACY1
hsa00670	One carbon pool by folate	KEGG Pathway	1	SHMT1
hsa04640	Hematopoietic cell lineage	KEGG Pathway	1	CD14
hsa05205	Proteoglycans in cancer	KEGG Pathway	1	LUM
hsa05132	Salmonella infection	KEGG Pathway	1	CD14
hsa00052	Galactose metabolism	KEGG Pathway	1	GLB1
hsa00830	Retinol metabolism	KEGG Pathway	1	ALDH1A1
hsa05202	Transcriptional misregulation in cancer	KEGG Pathway	1	CD14
hsa05221	Acute myeloid leukemia	KEGG Pathway	1	CD14
hsa00562	Inositol phosphate metabolism	KEGG Pathway	1	TPI1
hsa04620	Toll-like receptor signaling pathway	KEGG Pathway	1	CD14
hsa04668	TNF signaling pathway	KEGG Pathway	1	VCAM1
hsa04915	Estrogen signaling pathway	KEGG Pathway	1	CTSD
hsa04933	AGE-RAGE signaling pathway in diabetic complications	KEGG Pathway	1	VCAM1
hsa04614	Renin-angiotensin system	KEGG Pathway	1	CTSA
hsa04670	Leukocyte transendothelial migration	KEGG Pathway	1	VCAM1
hsa05143	African trypanosomiasis	KEGG Pathway	1	VCAM1
hsa00001	KEGG Orthology	KEGG BRITE (functional hierarchy)	29	ACY1; ALDH1A1; ARSB; ASAH1; CD14; CPQ; CTSA; CTSB; CTSC; CTSD; CTSH; FUCA1; GALNS; GGH; GLB1; GNS; HEXA; HEXB; LUM; MAN2B1; MAN2B2; NAGA; NUCB1; RNASET2; SERPINA3; SHMT1; TIMP2; TPI1; VCAM1
hsa01000	Enzymes	KEGG BRITE (functional hierarchy)	23	ACY1; ALDH1A1; ARSB; ASAH1; CPQ; CTSA; CTSB; CTSC; CTSD; CTSH; FUCA1; GALNS; GGH; GLB1; GNS; HEXA; HEXB; MAN2B1; MAN2B2; NAGA; RNASET2; SHMT1; TPI1
hsa01002	Peptidases and inhibitors	KEGG BRITE (functional hierarchy)	11	ACY1; ASAH1; CPQ; CTSA; CTSB; CTSC; CTSD; CTSH; GGH; SERPINA3; TIMP2
hsa04147	Exosome	KEGG BRITE (functional hierarchy)	10	ACY1; ASAH1; CD14; CTSA; CTSB; CTSC; CTSD; FUCA1; GLB1; TPI1
hsa03110	Chaperones and folding catalysts	KEGG BRITE (functional hierarchy)	5	CTSA; CTSB; CTSC; HEXA; HEXB
hsa04090	CD molecules	KEGG BRITE (functional hierarchy)	2	CD14; VCAM1
hsa04131	Membrane trafficking	KEGG BRITE (functional hierarchy)	2	CTSA; NUCB1
hsa04091	Lectins	KEGG BRITE (functional hierarchy)	1	VCAM1
hsa00537	Glycosylphosphatidylinositol (GPI)-anchored proteins	KEGG BRITE (functional hierarchy)	1	CD14
hsa00536	Glycosaminoglycan binding proteins	KEGG BRITE (functional hierarchy)	1	CTSB
hsa00535	Proteoglycans	KEGG BRITE (functional hierarchy)	1	LUM
hsa03016	Transfer RNA biogenesis	KEGG BRITE (functional hierarchy)	1	RNASET2
